# Supplementary material for: Management of Stromal Corneal Dystrophies; Review of the Literature with a Focus on Phototherapeutic Keratectomy and Keratoplasty
Source: Vision (Basel). 2023 Mar 13;7(1):22. doi: 10.3390/vision7010022 (PMC10059954; doi:10.3390/vision7010022)
Supplement: Supplementary file 1 [file vision-07-00022-s001.zip › vision-2063035-supplementary.xlsx]

## Sheet: Sheet1
Table S1. Summary of published papers on the outcome of PTK and keratoplasty in RBCD
Study	Year	Type of Study	Type of Keratoplasty	Graft size	Dissection method (in DALK)	Average Age	Dystrophy	Number of Eyes	Number of patients	PTK depth of abrasion	Follow up (Max follow up/Range)	Preop VA	Post-op VA	significant recurrence rate	Time before recurrence	Use of MMC	Notes
Rice, et al	1968	Case Report	lamellar keratoplasty	_	_	59 Y	Reis-Buckler	2	2	NA	18 months	_	6/24 and 6/36	_	8-20 years	NA	Incomplete evidence for the remaining 8 patients
Noble, Agrawal et al	2007	Case Report	DALK	6.5-8.5mm	Melles	34.2 Y	Reis-Buckler	80	68	NA	21.2 months (mean)		BCVA of 6/6 or better was present in 24.7%, 6/9 or better in 69.9%, and 6/12 or better in 84.9% of the eyes	0.093	4 years	NA
Fogla et al	2004	Case Report	SALK	_	_	24.6 Y	Reis-Buckler	4	2	113 - 137	16-22 monts	20/80 - 20/200	20/30 - 20/120	0		NA	Previous PTK in one patient
Steger et al	2016	Case Series	FLK	_	NA	41 Y	Reis-Buckler	4	3	110 - 140	29 months avr	0.18 - 0.48 logMAR	-0.08 - 0.18 logMAR	25% (but treated)	1.5 years	NA
Pratik	2022	Case Report	PTK	NA	NA	32 Y	Reis-Buckler	2	1	140 - 150	24 months	20/800	20/30	10% recurrance (vision went to 20/50)	2 years	_
Dinh et al	1999	Case Series	PTK	NA	NA	45 Y	Reis-Buckler	17	33 patients in study	40 - 100 typical	19.5 months avr	20/60 mean	20/30 mean	58.8	25.6 months	No	delayed corneal wound healing that may progress to corneal haze , corneal flattening
Stark et al	1992	Case Series	PTK	NA	NA	49.7 Y	Reis-Buckler	2	19 patients in study	variable (not listed)	12 months avr	20/20 - 20/800	20/20 - 20/400	0.2	2 years	No	Overall study data mostly averaged for all dystrophies - refer to other dystrophies
Hahn et al	1993	Case Report	PTK	NA	NA	55 Y	Reis-Buckler	1	1	50	10	20/300	20/50	0	9 months	No
Lawless et al	1993	Case Report	PTK	NA	NA	Not Listed	Reis-Buckler	9		variable (not listed)	Not Listed	6/60 avr	6/9 avr	0	_	No
Kasetsuwan et al	2000	Case Report	PTK	NA	NA	Not Listed	Reis-Buckler	4		Not Listed	9.9 months avr			0.25	_	No
Ayres et al	2006	Case Series	PTK	NA	NA	54 Y	Reis-Buckler	13	12	Not Listed	8.3 months		20/400	0	_	Yes
Miller et al	2004	Case Report	PTK	NA	NA	73 Y	Reis-Buckler	1	1	Not Listed	4 years	20/400	20/100	_	_	Yes
Vinciguerra et al	2018	Case Series	PTK (with peeling)	NA	NA		Reis-Buckler	14	8	Not Listed	12 years	20/50 avr	20/25 avr	0.1428	5.86 years	_
Rapuano and Laibson	2001	Case Series	PTK	NA	NA	Not Listed	Reis-Buckler	2	1	Not Listed	12 - 18 months	20/300	20/25	0	_	_
Hersh et al	1996	Case Report	PTK	NA	NA	51 Y	Reis-Buckler	5	4	Not Listed	1 year	20/25 - CF	20/20 - 20/400	0	_	_	Complications: Epithelialization, Stromal Haze/Scarring, Infection
Table S2. Summary of published papers on the outcome of PTK and keratoplasty in TBCD
Study	Year	Type of Study	Type of Keratoplasty	Graft size	Dissection method (in DALK)	Average Age	Dystrophy	Number of Eyes	Number of patients	PTK depth of abrasion	Follow up (Max follow up/Range)	Preop VA	Post-op VA	significant recurrence rate	Time before recurrence	Use of MMC	Notes
Sorour et al	2005	Case Report	PTK (8 eyes) PK (2 eyes)	_	NA	62.3 Y	Thiel-Behnke	10	5	Not Listed	8 months - 25 years	20/25 - 20/100	20/20 - 20/80	0.82	3.7 years	_	postoperative complications include delayed corneal wound healing that may progress to corneal haze, recurrent corneal erosions, infectious or sterile keratitis, and persistent epithelial defects
Hieda et al	2013	Case Report	PTK	NA	NA	55 Y	Thiel-Behnke	10	5	100 -140	12 months avr	0.15 - 1.22 logMAR	-0.18 - 0.22 logMAR	0.5	42 months	_	no complications
Hsiao and Hou	2017	Case Report	PTK (both eyes) PRK (1 eye)	NA	NA	43 Y	Thiel-Behnke	2	1	80	3 years	20/60 - 20/400	20/20 - 20/25	NA	_	Yes
Amm	1999	Case Report	PTK	NA	NA	Not Listed	Thiel-Behnke	6	5	100	8 months - 4 years	20/40 - 20/200	20/20 - 20/32	0.167	2.8 years	_
Abusayf et al	2022	Case Report	FLK	NA	NA	54 Y	Thiel-Behnke	2	1	120	6 months	CF	20/100	0		_
Hieda et al	2019	Case Series	PTK	NA	NA	49.3 Y	Thiel-Behnke	8	5	106.8	34.2 months	0.69 logMAR median	0.23 logMAR median	_	24 months	No	Bacterial corneal ulcers were observed for a few days after PTK in 2 of the 376 eyes
Table S3. Summary of published papers on the outcome of PTK and keratoplasty in LCD
Study	Year	Type of Study	Type of Keratoplasty	Graft size	Dissection method (in DALK)	Average Age	Dystrophy	Number of Eyes	Number of patients	PTK depth of abrasion	Follow up (Max follow up/Range)	Preop VA	Post-op VA	significant recurrence rate	Time before recurrence	Use of MMC	Notes
Dinh et al	1999	Case Series	PTK	NA	NA	45 Y	Lattice	7	33 patients in study	40 - 100 typical	19.5 months avr	20/60 mean	20/30 mean	14.3	5.4 months	No	Overall study data mostly averaged for all dystrophies - refer to other dystrophies
Stark et al	1992	Case Series	PTK	NA	NA	49.7 Y	Lattice	11	19 patients in study	variable (not listed)	12 months avr	20/20 - 20/800	20/20 - 20/400	0.2	2 years	No	Overall study data mostly averaged for all dystrophies - refer to other dystrophies
Gruenauer-Kloevekorn et al	2009	Case Series	PTK	NA	NA	89 Y	Lattice	1	1	Not Listed	Not Listed	20/400	20/200	_	38 months	No
Steger et al	2016	Case Series	FLK	NA	NA	32 Y	Lattice	1	1	110 - 140	30 months avr	0.48 logMAR	0.30 logMAR	_	_
Mohamed et al	2018	Case Report	PK (58 eyes) DALK (14 eyes)	7.7 mm	big‑bubble	44.6 Y	Lattice	72	57	Not Listed	3.1 years median	20/400 median	20/50 median	60% avr	10 years avr
Kawashima et al	2006	Case Report	DLKP (31 eyes) PKP (29 eyes)	7.5 mm	big‑bubble	55 Y	Lattice	60	31	Not Listed	1.5 years median	-0.892 logMAR median	-0.2 logMAR median	0.03	1.5 years
Unal et al	2013	Case Series	DALK	7 - 8.5 mm	big bubble	46.9 Y	Lattice	17	15	Not Listed	23.9 months median	1.28 logMAR median	0.56 logMAR median	0.353	33 months avr		complete reversal of stromal edema after initiation of intensive topical corticosteroid therapy
Spelsberg et al	2004	Case Series	PK (16 eyes) PTK (17 eyes)	7.7 mm	NA	55 Y	Lattice	33	26	Not Listed	34.2 months median	_	_	0.24	_		PLK long-term topical immune prophylaxis with 2 drops of prednisolone-21-acetat
Hersh et al	1996	Case Report	PTK	NA	NA	51 Y	Lattice	1	1	Not Listed	1 year	20/25 - CF	20/20 - 20/400	0	NA		Complications: Epithelialization, Stromal Haze/Scarring, Infection
Hieda et al	2019	Case Series	PTK	NA	NA	51.2 Y	Lattice	13	8	106.1	44.8 months	0.83 logMAR median	0.16 logMAR median	Not mentioned	74 months	No	Bacterial corneal ulcers were observed for a few days after PTK in 2 of the 376 eyes
Chiambaretta et al	2004	Case Report	PTK	NA	NA	38.9 Y	Lattice	19	13		36 months
Sauvageot et al	2022	Case Report	PTK	NA	NA	41 Y	Lattice	32	20	100.4 avr	3.8 Years	0.69 logMAR median	0.457 logMAR median	0.44	5 Years
Table S4. Summary of published papers on the outcome of PTK in GCD
Study	type of study	Number of eyes	Average age	post-op BCVA	ablation depth	use of MMC	Duration of follow up	significant recurrence rate	duration of time before significant recurrence	complications
Nassaralla, 1996	case series	2	53 Y	20/80 - 20/125	110μm	No	42 M	_	_	significant hyperopic shift
Mclean, 1996	case series	3	61 Y	0.2-0.6 LogMar	19.8 - 28 μm	no	2 Y	0.33	2 Y	mild haze
Orndahl 1998	case series	5	_	40% of patients gained 2 lines or more	35-70μm	no	32 M	0.2	52 M	hyperopic shift
Dinh 1998	case series	13	50 Y	20/30	_	no	1-71 months	23.1% (the rest had a shorted follow up)	40.3 M	no hyperopic shift due to the anti-hypermetropia protocol
Das, 2005	case series	62	45±16 years	_	15-110 μm	no	3.0±2.7 years	20%%	3.4±1.2 Y	nil
Chen, 2013	case series	15	_	0.24 _x0003_ 0.07	_		95 M	_	23.7 ±11.2 M	_
Lewis, 2017	case series	12	50 Y	20/25 - 20/30	156μm	yes	11.7 Y	_	2.7 Y	nil
Lee, 2018
Kemer, 2020	case series	27	42.75 ± 17.04	0.39 ± 0.25	87.3 ± 11.85 μm	yes	28.62 ± 5.18 m	0	NA	nil
Table S5. Summary of published papers on the outcome of keratoplasty in GCD
Study	type of study	type of keratoplasty	graft size	Dissection method (in DALK)	posterior stroma involvement (in DALK)	Source of recurrence	Number of patients	Average age	Post-op BCVA	duration of follow-up	significant recurrence rate	duration of time before significant recurrence
Frising, 2006	case report	repeat PK (x3)	_	N/A	N/A	anterior stroma and graft host junction	1	53 Y	20/40	_	_	_
Salouti, 2009	case series	DALK	_	Mellles	_	subepithelial, graft host junction, graft-host interface	7	37±9.4 Y	20/27	38.4 ± 18.6 M	0.43	34 ± 2 M
Rama, 2013	case report	DALK	_	_	_	graft-host interface	1	43 Y	20/30	1Y	NA	1 Y
Unal 2013	case series	DALK	7.25 - 9 mm	80% big bubble, 20% manual dissection	_	_	12	46.9 ± 16.7	0.28 ± 0. 17	43.5±23.9	0.22	33±7.7
Pntanelli, 2014	case report	DALK	8 mm	Melles	No	Posterior lamella (graft -host interface)	1	28 Y	20/30	3 years	na	3 years
Lewis, 2017	case series	ALK (165μm)	7.4	microleratom and femtolaser-assisted	_	anterior and central, one interface recurrence (Melles)	9	50 Y	20/30 - 20/50	11.7 Y	0.77	3.7 Y
	Case series	DALK	8.25	3 Melles, 3 big-bubble	_	anterior and central, one interface recurrence (Melles)	6	50 Y	20/30 - 20/50	11.7 Y	0.66	3.2 Y
	Case series	PK	7.75	N/A	_	anterior and central	23	50 Y	20/30 - 20/50	11.7 Y		13.7 Y
Kodavoor 2019	cross sectional	DALK	7.75-8.25 mm	big bubble and manual dissection	no posterior involvement	_	10	36.63 ± 7.88	0.28±0.15	1 year	_	_
Oke, 2020	case report, 1	DALK	8.5	big bubble T 1	posterior involvement	graft-host interface	1	29 Y	20/25	3 years	simple recurrence	NA
	case report 2 R	DALK	_	big bubble T 1	_	graft-host interface	1	53 Y	20/25	6 years	significant recurrence	6 Y
	Case report 2 L	DALK	_	big bubble T 2	_	NA	1	56 Y	20/30	4 years	no recurrence	4 Y
Table S6. Summary of published papers on the outcome of PTK in MCD
Study	type of study	Number of patients	Average age	post-op BCVA	ablation depth	use of MMC	Duration of follow up	significant recurrence rate	duration of time before significant recurrence	complications
Wagoner, 1999	case report	1	21	20/30	30-50 μm after epithelial removal	no	2 years	no recurrence	NA	mild haze, visually non-significant
Hafner, 2005	case series	10	23±8	20/30	20-100 μm	no	54±37.2 month	0.9	3.4±0.04 years	transient very mild haze
Reddy, 2013, virgin eyes	case series	2	unknown	20/28	88±21 μm	no	31±35 months	0.5	59 months	transient haze
Reddy, 2013, post PK eyes	case series	1	unknown	20/32	71±24 μm	no	53±31 months	no recurrence	NA	transient haze
Chen, 2013	case series	4			30-100 μm	no	95 months	unknown	13.5±5.9 months	nil reported
Shields, 2020	case report	1	16	9/9.6	35 μm after epithelial removal	yes	18 months	NA	18 months
Gassel, 2022	case report	1	32	_	unknown	_	18 months	NA	18 months	unknown
Kemer, 2020	case series	14	35.64 ± 12.75	0.37 ± 0.20	94.57 ± 7.45μm	yes	28.79 ± 3.12 months	0.14	33 months	nil reported
Table S7. Summary of published papers on the outcome of keratoplasty in MCD
Study	type of study	type of keratoplasty	graft size	Dissection method (in DALK)	posterior stroma involvement (in DALK)	Source of recurrence	Number of eyes	Average age at the time of procedure, years	Post-op mean BCVA	duration of follow-up	significant recurrence rate	mean duration of time before significant recurrence
Robin, 1977	case report	lamellar, 0.5 mm	9 mm	dissection,	_	hast-graft interface	2	20	20/25	11 years	na	11 years
Klintworth, 1983	case series	PK and DALK	7.5 mm and 8 mm	_	_	in lamellar: graft-host interface, in PK: diffuse	4	18	no data	20	na	20 years
Akova, 1990	case series	PK	5-8 mm	NA	NA	_	31	41 ± 4		149 ±29 months	0.2	182±29 months
Al-swailem 2005	case series	PK	6.75-8 mm	NA	NA	_	229	35.6±13%	_	1-17 years	0.052	84±48.2 months
Kawashima, 2006	case series	PK	7.75 mm	NA	NA	_	14	46±11	_	55.4 months	_	_
Kawashima, 2006	case series	DALK	7.75 mm	manual dissection	_	_	10	42±10	_	29.5 months	_	_
Unal, 2013	case series	DALK	7.25 - 9 mm	80% big bubble, 20% manual dissection	_	_	44	46.9 ± 16.7	0.28 ± 0. 17	43.5±23.9	0.023	33±7.7
Sogutlu, 2013	prospective	DALK	_	big bubble	no posterior involvement	_	35	29.7	20/16	30.5 ± 8.75	0.057
	Prospective	PK	_	NA	no posterior involvement	_	41	33	20/16	31.2 ± 9.78	0.048
Giri 2013	case report	DALK	7.75 mm	manual dissection	no posterior involvement	NA	1	14	0.6	3 months	NA	NA
Cheng, 2013	case series	PK	7.25-8 mm	NA	_	graft-host junction	57	37.9±13.5 years	_	_+A86:B86	40% in 10 years	_
		DALK	7.25-8.25 mm	_	_	graft-host interface	21	37.9±13.5 years	_	3.4±2.1 years	49.5% in 9 years	_
Reddy, 2015	case series	PK	8.1 mm	NA	_	_	109	34 years	_	43±24.1 years	_	_
		DALK	8 mm	big bubble in 57%, manual dissection in 43%	_	_	21	30 years	_	17±8.8 years	_	_
Kodavoor 2019	cross sectional	DALK	7.75-8.25 mm	big bubble and manual dissection	no posterior involvement	_	16	27.9 ± 5.19 years	0.29±0.3	1 year
Bischoff-Jung,2020	case report	PK	6 mm				2	na		50 years		46 and 50 years
Alaraj, 2021	case series	PK	7.7 ± 0.26 mm	NA	_	_	135	31.5 ± 8.4 years	76.3% 0.3 or better	9.7 ± 4.1 years	0.029	9.6 ±5.1 years
		DALK	7.8 ± 0.28 mm	big bubble, hydrodissection, viscodissection	_	_	22	28.2 ± 7.5 years	91% 0.3 or better	7.2 ± 6.2 years	0.045	5.1 years
Table S8. Summary of published papers on the outcome of PTK and keratoplasty in SCD
Study	Year	Type of Study	Type of Keratoplasty	Graft size	Dissection method (in DALK)	Average Age	Dystrophy	Number of Eyes	Number of patients	PTK depth of abrasion	Follow up (Max follow up/Range)	Preop VA	Post-op VA	significant recurrence rate	Time before recurrence	Use of MMC	Notes
Kitazawa et al	2018	Case Report	PK	7.75 mm	NA	61.5 Y	Schnyder	6	5	Not Listed	8 - 10 years	0.22 - 1.7 logMAR	0.02 logMAR	0
Weiss et al	2007	Case Series	PK	_	NA	38.8 Y	Schnyder	115	112	Not Listed	5 - 8 years	20/50 - 20/100	72% achieved 20/50	0.21	5 years		. A detailed comparison with pre-op visual acuity was limited due to missing records as well as co-existing ocular pathology in a number of patients.
Dinh et al	1999	Case Series	PTK	NA	NA	45 Y	Schnyder	1	33 patients in study	40 - 100 typical	19.5 months avr	20/60 mean	20/30 mean	0		No	Overall study data mostly averaged for all dystrophies - refer to other dystrophies
Rapuano and Laibson	2001	Case Series	PTK	NA	NA	Not Listed	Schnyder	1	1	Not Listed	12 - 18 months	20/50	20/30	1	18 months		Eye functional worse after treatment
Köksal et al	2004	Case Report	PTK	NA	NA	43 Y	Schnyder	2	1	130	68 months	2/10	4/10 - 8/10	0
